# Supplementary material
Source: PubMed Central journal article supplement (PMC4381769)
Supplement: jn.114.207233_nutrition207233SupplementaryData1.pdf [file jn.114.207233_nutrition207233SupplementaryData1.pdf]

**Online Supporting Material**

**SUPPLEMENTAL TABLE 1** Associations between mothers' child-feeding practices and child's sugar-sweetened beverage<sup>1</sup> (SSB) intake among 6 y old stratified by child's weight status — Infant Feeding Practices Year 6 Follow-Up Study, 2012 (n=1350)

| Mothers' child-feeding practices <sup>3</sup>                                                           | SSB intake during the past month at 6 y of age by child's weight status |                 |                       |                           |                       |           | P value <sup>a</sup> |                       |                      |
|---------------------------------------------------------------------------------------------------------|-------------------------------------------------------------------------|-----------------|-----------------------|---------------------------|-----------------------|-----------|----------------------|-----------------------|----------------------|
|                                                                                                         | Underweight/normal weight children                                      |                 |                       | Overweight/obese children |                       |           |                      |                       |                      |
|                                                                                                         | 0 times/d                                                               | >0 to <1 time/d | ≥1 time/d             | 0 times/d                 | >0 to <1 time/d       | ≥1 time/d |                      |                       |                      |
|                                                                                                         | n                                                                       | % <sup>2</sup>  | time/d % <sup>2</sup> | % <sup>2</sup>            | time/d % <sup>2</sup> | n         | % <sup>2</sup>       | time/d % <sup>2</sup> | P value <sup>a</sup> |
| Make sure that my child does not eat too many sweets or junk foods                                      | 1031                                                                    |                 |                       |                           |                       | 319       |                      |                       | 0.0001               |
| No                                                                                                      | 113                                                                     | 14.2            | 54.9                  | 31.0                      | 57.8                  | 45        | 4.44                 | 37.8                  |                      |
| Yes                                                                                                     | 918                                                                     | 21.2            | 63.4                  | 15.4                      | 64.2                  | 274       | 15.0                 | 20.8                  |                      |
| If I did not guide or regulate my child's eating, my child would eat too much of his/her favorite foods | 1031                                                                    |                 |                       |                           |                       | 319       |                      |                       | 0.003                |
| No                                                                                                      | 349                                                                     | 25.8            | 60.7                  | 13.5                      | 57.6                  | 92        | 16.3                 | 26.1                  |                      |
| Yes                                                                                                     | 682                                                                     | 17.7            | 63.3                  | 18.9                      | 65.6                  | 227       | 12.3                 | 22.0                  |                      |
| Especially careful to make sure my child eats enough                                                    | 1031                                                                    |                 |                       |                           |                       | 319       |                      |                       | 0.07                 |
| No                                                                                                      | 367                                                                     | 23.2            | 62.9                  | 13.9                      | 63.8                  | 127       | 16.5                 | 19.7                  |                      |
| Yes                                                                                                     | 664                                                                     | 19.0            | 62.2                  | 18.8                      | 63.0                  | 192       | 11.5                 | 25.5                  |                      |
| Encourage your 6-y-old to eat all of the food on his/her plate                                          | 1031                                                                    |                 |                       |                           |                       | 319       |                      |                       | 0.08                 |
| No                                                                                                      | 419                                                                     | 23.6            | 61.1                  | 15.3                      | 65.5                  | 148       | 13.5                 | 21.0                  |                      |
| Yes                                                                                                     | 612                                                                     | 18.3            | 63.4                  | 18.3                      | 61.4                  | 171       | 13.5                 | 25.2                  |                      |

<sup>1</sup> Include regular soda, sweetened drinks such as Kool-Aid™, lemonade, sweet tea, Hi-C™, cranberry cocktail, Gatorade™, and others.

<sup>2</sup> Percentages may not add up to 100% because of rounding.

<sup>3</sup> “No” included “1”, “2”, and “3” on the Likert scale and “Yes” included “4” and “5” on the Likert scale.

<sup>a</sup> Based on  $\chi^2$  tests.
